## Microbial and chemical risk from reclaimed water use for residential irrigation

Jennifer Weidhaas <sup>a,\*</sup>, McKinley Olsen<sup>b</sup>, Joan E. McLean<sup>c</sup>, Niel Allen<sup>c</sup>, Leila Ahmadi<sup>c</sup>, Kwame Duodu<sup>c</sup> and Ryan Dupont<sup>c</sup>

<sup>a</sup> University of Utah, 110 Central Campus Drive, Salt Lake City, UT 84108, USA

<sup>b</sup> Geosyntec Consultants, 1111 Broadway, Oakland, CA 94607, USA

<sup>c</sup> Utah Water Research Laboratory, Utah State University, 8200 Old Main Hill, Logan, UT 84322, USA

\*Corresponding author. E-mail: jennifer.weidhaas@utah.edu

 JW, 0000-0002-5431-6794

### ABSTRACT

Arid and semi-arid locations are increasingly utilizing nontraditional irrigation water including reclaimed wastewater. Human health risk associated with reclaimed wastewater use was determined by testing reservoir, distribution line and home spigot water ( $n=190$ ) and 14 types of vegetables and fruits ( $n=90$ ) harvested from 5 home gardens for 7 waterborne pathogens, 47 antibiotic resistance genes and 12 pharmaceuticals and personal care products (PPCPs). Based on surveys of the residents' use of the reclaimed wastewater, two exposure routes were modeled: irrigation of fruits and vegetables and drinking from irrigation hoses. Probabilistic quantitative microbial risk assessment indicated that consumption of raw vegetables and fruits exceeded a 0.015 benchmark illness rate due to adenovirus and enterococci. Chemical risk assessments indicated that consumption of tons of vegetables per day and hundreds to millions of gallons of water per day would be needed to reach an unacceptable risk among the 10 PPCPs detected in home spigot water, indicating *de minimis* risk from PPCPs. Eight different drug resistance gene families were detected in the water samples and crops indicating that antibiotic-resistant organisms are present on foods irrigated with reclaimed water containing pharmaceuticals. These results elucidate the combined risk from pathogens and PPCPs from reclaimed wastewater irrigation.

**Key words:** home gardens, irrigation, pathogens, pharmaceutical and personal care products, reclaimed wastewater, risk assessment

### HIGHLIGHTS

- Reclaimed wastewater irrigation presents unacceptable microbial human health risks.
- Reclaimed wastewater used for irrigation fosters antibiotic resistance associated with PPCPs.
- Irrigation with reclaimed wastewater presents *de minimis* chemical health risk.
- Pathogens and PPCPs accumulate differentially in vegetable skin and flesh.

## GRAPHICAL ABSTRACT

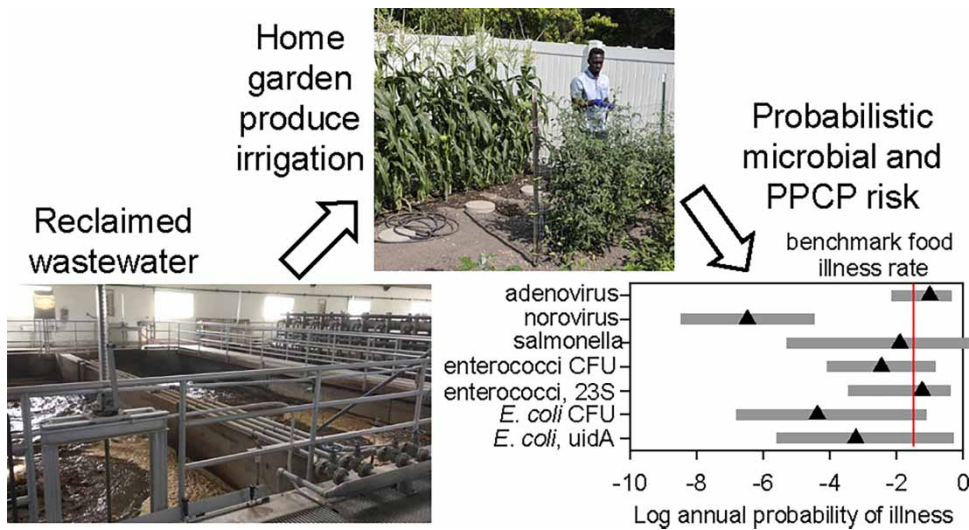

## INTRODUCTION

The availability of water and its sustainable management has become a critical issue for many drought-stricken or water resource-limited communities in the United States. Diminished water supplies have resulted in an increased use of treated municipal wastewater, commonly known as reclaimed wastewater, for reuse applications. Reclaimed wastewater is a valuable resource for crop irrigation, in particular in semi-arid and arid climates not only as a water source, but also as a source of nutrients. State regulatory authorities typically specify a certain level of treatment and monitoring of reclaimed wastewater to protect public health and the environment, in a fit-for-purpose approach (Chhipi-Shrestha *et al.* 2017). Water quality regulations for utilizing reclaimed wastewater for irrigation typically specify acceptable log reductions of microorganisms, physicochemical parameters (e.g., turbidity, oxygen demanding material, chlorine residual), agronomic parameters (e.g., salinity, sodium adsorption ratio, pH), and the number and types of treatment technologies required for the particular reuse scenario (Shoushtarian & Negahban-Azar 2020). Yet depending on the level of treatment there may still be waterborne pathogens or pharmaceuticals and personal care products (PPCPs) present in reclaimed wastewater used for irrigation. In the fit-for-purpose treatment approach, various engineered and agricultural controls can be utilized to reduce the potential risk to users irrigating with reclaimed wastewater (Mohr *et al.* 2020). For example, irrigation methods can be selected to limit risk to consumers by either limiting the edible portion of the crops exposed to irrigation water (i.e., drip or subsurface irrigation of lettuce) or only irrigating crops that are cooked prior to eating (i.e., potatoes) (van Ginneken & Oron 2000).

Depending on the level of treatment of reclaimed wastewater, numerous waterborne pathogens have been reported to be present including various bacteria (e.g., *Escherichia coli*, enterococci, Staphylococci, Salmonella) (Goldstein *et al.* 2014b; Santiago *et al.* 2018), protozoans (e.g., *Giardia* and *Cryptosporidium*) (Ryu *et al.* 2007; Domenech *et al.* 2018) and viruses (e.g., adenovirus, norovirus) (Jjemba *et al.* 2010; Gonzales-Gustavson *et al.* 2019). Yet the risk to human health from exposure to these pathogens in reclaimed wastewater used for irrigation is not always clear. This uncertainty arises from (1) lack of analysis of pathogens themselves and reliance instead on fecal coliforms which do not always correlate with pathogen abundance (Wu *et al.* 2011); (2) lack of information on the viability of the pathogens due to reliance on nucleic acid-based techniques rather than culturing (Whiley & Taylor 2016); (3) lack of studies on persistence of pathogens after irrigation and (4) left-censored datasets of pathogen concentrations below detection limits (Kato *et al.* 2013). Furthermore, there are a limited number of risk assessments of vegetable crops irrigated with reclaimed wastewater where the crops themselves were evaluated for pathogens. Instead, many quantitative microbial risk assessments (QMRA) for irrigation of foods are based on measuring coliforms or pathogens in water that are presumed to be retained on crops (van Ginneken & Oron 2000; Hamilton *et al.* 2006; Al-Sa'ed 2007; Ryu *et al.* 2007; Verbyla *et al.* 2016; Gonzales-Gustavson *et al.* 2019).

In addition to risks posed by pathogens, PPCPs in reclaimed wastewater used for irrigation may also present human health risks. There are several review articles on the impacts of PCPPs on vegetable crops irrigated with reclaimed wastewater (Qin

*et al.* 2015; Wu *et al.* 2015; Miller *et al.* 2016; Fu *et al.* 2019) and human risk assessment. The emphasis of these studies has been the uptake and translocation of chemicals of concern into edible roots and above ground tissue of fruit or vegetable crops. Studies have been conducted using hydroponic systems (Dodgen *et al.* 2013, 2015; Wu *et al.* 2013) and greenhouse (Wu *et al.* 2010; Goldstein *et al.* 2014a) or lysimeter studies (Malchi *et al.* 2014; Mordechay *et al.* 2018). Few studies have been conducted under field-irrigation conditions. Field conditions that were studied included drip irrigation (Riemenschneider *et al.* 2016; Christou *et al.* 2017b) or buried drip tape (Wu *et al.* 2014) for water delivery to the plants in commercial agriculture practices. The use of sprinkler irrigation of home vegetable gardens has not been reported. Studies evaluating risks for humans consuming fruits and vegetables irrigated with reclaimed wastewater report the risk is *de minimis* (Prosser & Sibley 2015; Christou *et al.* 2017b; Liu *et al.* 2020). Two exceptions are notable. Carbamazepine and its metabolites were detected in urine of individuals who consumed produce irrigated with reclaimed water (Paltiel *et al.* 2016) and the metabolites of carbamazepine, as genotoxic compounds, were reported to pose a risk through the consumption of the leaves of carrots and sweet potato and the roots of carrots (Malchi *et al.* 2014).

Few studies include a comprehensive evaluation of both microbial and chemical risk (Munoz *et al.* 2010) from irrigation with reclaimed wastewater in home gardens and evaluate exposure risk to both irrigation water and produce. There is also evidence to suggest that individuals may use reclaimed wastewater in a variety of ways beyond irrigation. In a survey of community members in the study area of Hyrum, UT, it was reported that 11.8% of the citizens who had access to reclaimed wastewater used the water to fill swimming pools, 29.4% for children's water play, and the 3.7% for infrequent drinks out of the hose; exposure routes not considered in previous studies (Flint & Koci 2021). Therefore, the overall goal of this project was to evaluate chemical and microbial risks to residents, primarily using reclaimed wastewater for sprinkler irrigation in home gardens and infrequently as drinking water. Microbial risk was evaluated using traditional coliform measurements, quantitative polymerase chain reaction (qPCR) for specific pathogens and antibiotic resistance genes in irrigation water and associated with fruits and vegetables.

## MATERIALS AND METHODS

### Water reclamation system description

The Hyrum, UT wastewater treatment plant (WWTP), located at latitude 41°39'19.20"N and longitude 111°51'40.67"W, treats an estimated 3.8 million L/d of primarily domestic wastewater from a population of 8,200. The unit processes at the treatment plant include screening, grit removal, anoxic/aerobic basins with membrane separation (via a membrane bioreactor, MBR) and UV disinfection. During the months of November to March, the treatment plant discharges to Spring Creek at latitude 41°39'06"N and longitude 111°52'50"W. From mid-April to October, water is distributed directly to residents for use as nonpotable irrigation water without post-chlorination. The nonpotable irrigation water distribution line is stagnant or empty over winter. During early April, the reclaimed wastewater distribution main line is used to fill a small irrigation reservoir (Figure 1) with treated wastewater effluent before surface irrigation water is available from a nearby surface water supply. The volume of reclaimed wastewater is not sufficient to meet irrigation needs, therefore as the irrigation season progresses, some parts of the city receive blended water containing reuse wastewater from the Hyrum WWTP and surface water from the irrigation reservoir. Therefore, different parts of the city receive either only reclaimed wastewater (L1, L2 and L3), only surface water (L6, L7 and reservoir at the end of season) or a mixture of reclaimed wastewater and surface water (L4 and L5) throughout the irrigation season.

### Water sample collection and handling

All water samples were collected in separate sterile 4-L amber glass bottles for microbial and PPCP analysis. Details of the samples collected and dates of collection are shown in Supplementary Table S1. After aseptic collection of samples for microbial analysis, samples were stored on ice during transport to the laboratory. All water samples for microbial analysis were stored at 4 °C upon arrival and were processed within 12 h of arrival at the laboratory. The water samples for PPCP analysis were returned to the laboratory within 4 h and stored at 4 °C.

### Vegetable and soil sample collection and handling

Fourteen types of vegetables and fruits (Supplementary Table S1) were collected from five household gardens that were located close to the WWTP (Figure 1, locations G1 to G5). Vegetables and fruits that are eaten raw, with the exception of

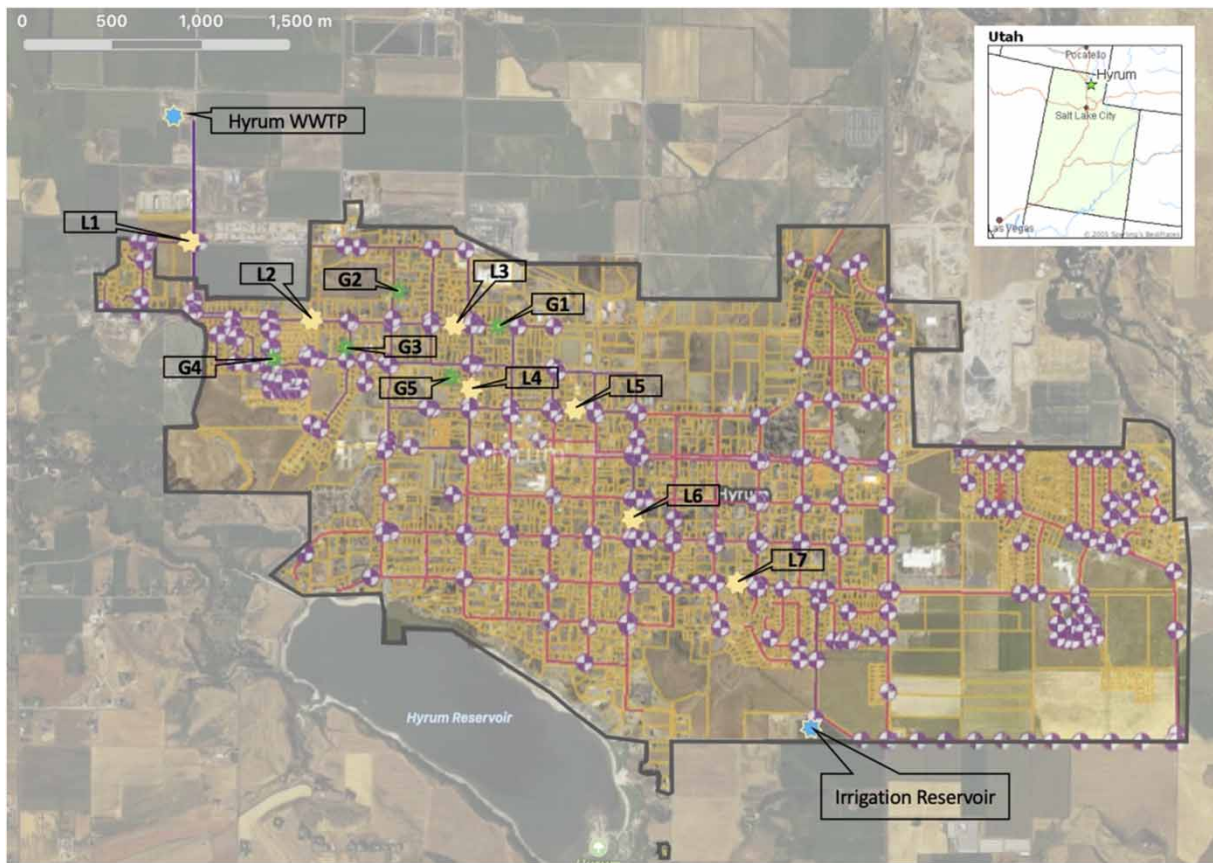

**Figure 1** | Sample collection locations and distribution line for reclaimed wastewater in Hyrum, UT. L#, distribution line sampling locations; G#, garden sampling locations.

potatoes, were sampled and analyzed along with soil co-located with the plants. Vegetation and soil collection and processing methods are detailed in the Supplementary material and Table S1.

### Pathogen detection methods

Pathogens in water, soil and vegetables were quantified by both culture and qPCR. Culturing of *E. coli* and enterococci from samples was performed following EPA Methods 1603 and 1600, respectively (USEPA 2002a, 2002b). Modified MTEC and MEI agar (Hardy Diagnostics, USA) were prepared based on the manufacturer's instructions. Water samples were also filtered through sterile mixed cellulose ester 0.45 and 0.22  $\mu\text{m}$  filters (Fisher Scientific Inc., USA), as necessary. Nucleic acids were extracted from the filters using the methods described in the Supplementary material. Quantitative PCR was used to determine the abundance of the *uidA* gene of *E. coli*, the 23S rRNA gene of *Enterococcus* spp. (enterococci), the *invA* gene of *Salmonella enterica*, the *mip* gene of *Legionella pneumophila*, the  $\beta$ -giardin gene of *Giardia intestinalis*, the polymerase-capsid junction (ORF1-ORF2) of norovirus genotype I and the hexon gene for serotypes human adenovirus serotype 40 and 41. Standard curves were made using a nine-fold serial dilution of plasmids containing *uidA*, *invA* or 18S genes or stabilized Ultramer<sup>®</sup> DNA oligonucleotides (Integrated DNA Technologies, USA) for *L. pneumophila*, *G. intestinalis*, Norovirus GI and Human Adenovirus 40/41. The thermocycler conditions, primer and probe concentrations and mastermix used for qPCR are presented in Supplementary Table S2. The abundance of pathogens in samples determined by qPCR in gene copies/mL water or gene copies/g vegetable or soil were converted to cells per mL or g by dividing by the number of gene loci per organism. It was assumed that *E. coli* had five copies of *uidA* (Metcalf & Wanner 1993); enterococci have nine copies of 23S rRNA (Chakravorty *et al.* 2007); *Salmonella* spp. have five copies of *invA* (González-Escalona *et al.* 2009) and *Giardia intestinalis* have two copies of  $\beta$ -Giardin P241 (Alonso *et al.* 2010). Norovirus, adenovirus and *Legionella* were assumed to have one copy of the gene targeted by qPCR.

### Antibiotic resistance profiling

The nucleic acids extracted from the water distribution system lines ( $n=12$ ), irrigation reservoir ( $n=2$ ), treatment plant effluent ( $n=2$ ) and crops ( $n=3$  each of cherry tomato, cucumber, lettuce and zucchini) were analyzed for antibiotic resistance genes at the University of Minnesota. Details of the microfluidic qPCR assay targeting 47 antibiotic resistance genes were described previously (Ahmed *et al.* 2018). The resulting concentrations of ARGs were normalized by the mass of DNA extracted from each sample as measured by a Qubit fluorometer.

### Quantitative microbial risk assessment methods

All pathogen concentrations for vegetables and water were aggregated and a Bayesian analysis of the left-centered data was performed to generate distributions for each exposure route. Details of the Bayesian analysis, R code, distributions of raw data and model fit parameters are included in Supplementary Figures S1 and S2. The two exposure routes considered for home gardeners were: (1) direct ingestion through drinking from a hose and (2) eating raw produce irrigated with the reclaimed water with and without rinsing. The exposure routes were selected based on surveys of the community where 3.7% of respondents indicated drinking from the hose containing reclaimed wastewater and 92% of respondents used the reclaimed wastewater to irrigate vegetables (Flint & Koci 2020). The daily dose of pathogen ingested through eating vegetables was estimated by  $Dose_{vegetables} = C_i * M_{veg} * M_{body}$ . Furthermore, as many QMRA studies evaluate contaminated water retained on vegetables as a surrogate for testing vegetables themselves, we also estimated the daily dose of pathogen ingested through reclaimed wastewater retained on vegetables by  $Dose_{water\ on\ vegetables} = C_i * M_{veg} * M_{body} * V_{water\ retained}$ . The daily dose of pathogen ingested during drinking from a reclaimed wastewater hose was estimated by  $Dose_{drinking\ water\ ingestion} = C_i * V_{drinking\ water}$ . Where  $C_i$  is drawn from 10,000 resamplings of the Bayesian transformed distribution for each pathogen in reclaimed wastewater or on vegetables measured by culture and/or qPCR methods;  $M_{veg}$  is the mass of vegetables consumer per unit body weight per day; the  $M_{body}$  is the body weight of an average adult in the United States;  $V_{water\ retained}$  is the volume of reclaimed wastewater retained on lettuce after irrigation and  $V_{drinking\ water}$  is the volume of water consumed from a hose. Furthermore, the  $V_{drinking\ water}$  from a hose was assumed to be the volume of cold tap water consumed at home by pregnant women employed part time or less. While this assumption is less conservative than assuming the total volume of water consumed in a day comes from the garden hose, it is likely still over estimating the volume of reclaimed wastewater that is consumed per exposure event from a hose (USEPA 2019).

The annual probability of infection after eating vegetables or drinking water contaminated with *E. coli* (Powell *et al.* 2000) or *Salmonella* (Ahmed *et al.* 2010) were estimated using the beta-Poisson model, with enterococci (Tseng & Jiang 2012) and adenovirus (Teunis *et al.* 2016) by two different exponential models, and with norovirus (Messner *et al.* 2014) by the fractional Poisson model. Details of the exposure models, parameters and assumptions for each organism are shown in Supplementary Tables S3 and S4. The probability of illness,  $P_{ill}$ , was determined by modifying the probability of infection,  $P_{inf}$ , by the model  $P_{ill} = P_{inf} * P_{ill|inf}$ . The probability of illness given infection,  $P_{ill|inf}$ , for each organism is shown in Supplementary Table S4. The annual risk of disease,  $P_{ann\ ill}$ , was calculated by  $P_{ann\ ill} = 1 - (1 - P_{ill})^n$ , where  $n$  represents the number of exposure events per year (Seidu *et al.* 2013). In this study, it was assumed that people ate vegetables irrigated with reclaimed wastewater either 15, 30 or 90 days a year and drank reclaimed wastewater from the garden hose once or twice per week during the growing season or 12–36 days per year. The models did not account for the decay of pathogens on produce after deposition.

The estimated annual probability of illness was compared against two benchmarks. First, residents drinking reclaimed wastewater from the hoses were compared against the acceptable probability of illness benchmark from the USEPA of a one-time infection per 10,000 individuals in a given year (abbreviated as  $10^{-4}$  per person per year or pppy) (Rose & Gerba 1991). Previous QMRA studies for vegetables irrigated with reclaimed wastewater have commonly applied the drinking water  $10^{-4}$  probability of infection per year benchmark (Hamilton *et al.* 2006). This benchmark is highly conservative. Second, data from the CDC on annual illness originating from pathogen contaminated vegetables reports 9,388,075 annual illnesses from 1998 to 2008 for an average population of 298 million US citizens in 2006 (Scallan *et al.* 2011). This results in a  $3.15 \times 10^{-2}$  pppy or 315 in 10,000 individuals in a given year falling ill from pathogens on produce.

The QMRA distribution fittings, calculations and random sampling for the risk study were conducted with SAS (ver. 9.4; SAS Institute, Inc., Cary, NC) using PROC UNIVARIATE, PROC COOR and the RAND function. All input parameters were drawn from 10,000 random samplings of their probability distribution functions (Supplementary Tables S3 and S4). The sensitivity of the estimated probability of infection due to variability in the input parameters was assessed by evaluating the Pearson correlation between the  $P_{ann\ inf}$  and input parameters (e.g., pathogen concentration, volume of water retained).

This method was chosen due to its ease of implementation and ability to show nonlinear correlations between parameters as reported previously (Hamilton *et al.* 2006; Haas *et al.* 2014; Verbyla *et al.* 2016).

### PPCP analysis

The analytes used in this study included pharmaceuticals (acetaminophen, carbamazepine, gemfibrozil, sulfamethoxazole and fluoxetine), hormones (estrone, progesterone and  $\beta$ -estradiol), personal care products (*N,N*-diethyl-metolouamide (DEET) and triclosan), a fire-retardant (*tris*-2-chloroethyl phosphate) and caffeine. These compounds were selected due to their wide usage and varying physical/chemical properties providing representative chemicals of the many the PPCPs commonly used. Samples were analyzed for PPCPs using a modified USEPA Method 1694. The selected PPCPs were quantified using an Agilent 1290 Infinity LC system with an Agilent 6490 Triple Quadrupole MS. Details of sample processing and analytical methods are given in the Supplementary material.

### PPCP risk assessment methods

The two PPCP exposure routes considered for home gardeners were the same as those considered for the microbial risk. None of the PPCPs evaluated in this study are reported carcinogens, and quantitative risks associated with chemical PPCP exposure due to the use of reclaimed wastewater was estimated by using the following clinical dose or toxicity endpoints: clinical dose of pharmaceuticals, mg/d; toxic dose low (TD<sub>LO</sub>), mg/kg and average daily intake (ADI), mg/kg, for 70 kg adult and/or 7 kg infant; no-observed-adverse-effect level (NOAEL), mg/d and the margin of exposure (MOE)=NOAEL/Calculated Dose based on 1 L/d water or 336 g/d vegetable intake, which is recommended to be >10 (Coordinators 2017). The values of these clinical doses or toxicity endpoints available for the PPCPs monitored in this study are shown in Supplementary Table S5. If a clinical dose was available for a compound, the volume of water, Vol<sub>water</sub>, or mass of vegetable matter, Mass<sub>vegetable</sub>, that would need to be consumed to reach this clinical dose was calculated by Vol<sub>water</sub>=Clinical Dose/C<sub>w</sub> or Mass<sub>vegetable</sub>=Clinical Dose/C<sub>v</sub>, where C<sub>w</sub> and C<sub>v</sub> are the highest concentration of the compound measured in the paired garden spigot water (mg/L) and the household garden vegetable samples (mg/g), respectively, from samples collected in 2018. If a TD<sub>LO</sub> or an ADI were available, the lowest Vol<sub>water</sub> or Mass<sub>vegetable</sub> required to reach these doses were calculated by Vol<sub>water</sub>=TD<sub>LO</sub> or ADI\*70 kg/(C<sub>w</sub>) for adult exposure [or 7 kg/(C<sub>w</sub>) for infant exposure] or Mass<sub>vegetable</sub>=TD<sub>LO</sub> or ADI\*70 kg/C<sub>v</sub> for adult exposure [or 7 kg/(C<sub>v</sub>) for infant exposure]. If a NOAEL for a compound was available, an MOE was calculated based on the ratio of the calculated dose expected from exposure to the highest concentrations for that PPCP detected in a spigot or vegetable sample collected during the study, and standard 1 L/d water or 336 g/d vegetable intake values. The MOE was then calculated by MOE=NOAEL/[(C<sub>w</sub>)\*(1 L/d)] or NOAEL/[(C<sub>v</sub>)\*(336 g/d)].

## RESULTS AND DISCUSSION

### Seasonal PPCP concentrations in treatment plant effluent and distribution line reuse wastewater

The PPCPs included in this study, with the exception of  $\beta$ -estradiol and estrone, were consistently detected in the wastewater effluent and in the irrigation reservoir (Figure 2). The concentrations of most PPCPs in the effluent were similar to literature values (Munoz *et al.* 2010; Goldstein *et al.* 2014a; Malchi *et al.* 2014); however, the concentration of sulfamethoxazole was consistently an order of magnitude higher (Figure 2) than reported in other studies (Wang & Gardinali 2014; Chitescu *et al.* 2015). The entire distribution system was initially influenced by the WWTP effluent (Figure 2, spring plots) as effluent is used to fill the reclaimed water distribution system and irrigation reservoir prior to the availability of surface water supplied by canal in the spring. However, by the end of the irrigation season, the influence of the WWTP effluent is found primarily in the northwest sector of the reclaimed wastewater system (Figure 2, line locations L2 and L3) as the wastewater treatment effluent supplies only a portion ( $\approx 14\%$ ) of the total irrigation demand during the warmer portion of the summer.

### Microbial quality of treatment plant effluent and distribution line reclaimed wastewater

Pathogens were detected by qPCR and culture-based methods in the treatment plant effluent and water from the reservoir and distribution system (Figure 3, blue bars). Viable cells estimated by culture-based methods for *E. coli* and enterococci (data not shown) were typically lower than those estimated by qPCR presented in Figure 3. The range of *E. coli* and enterococci determined by culture-based methods in the treatment plant effluent were below typical permitted discharge limits at  $0.55 \pm 0.07$  and  $2.4 \pm 2.6$  CFU/100 mL (average  $\pm$  standard deviation), respectively. The coliforms estimated by qPCR were higher,

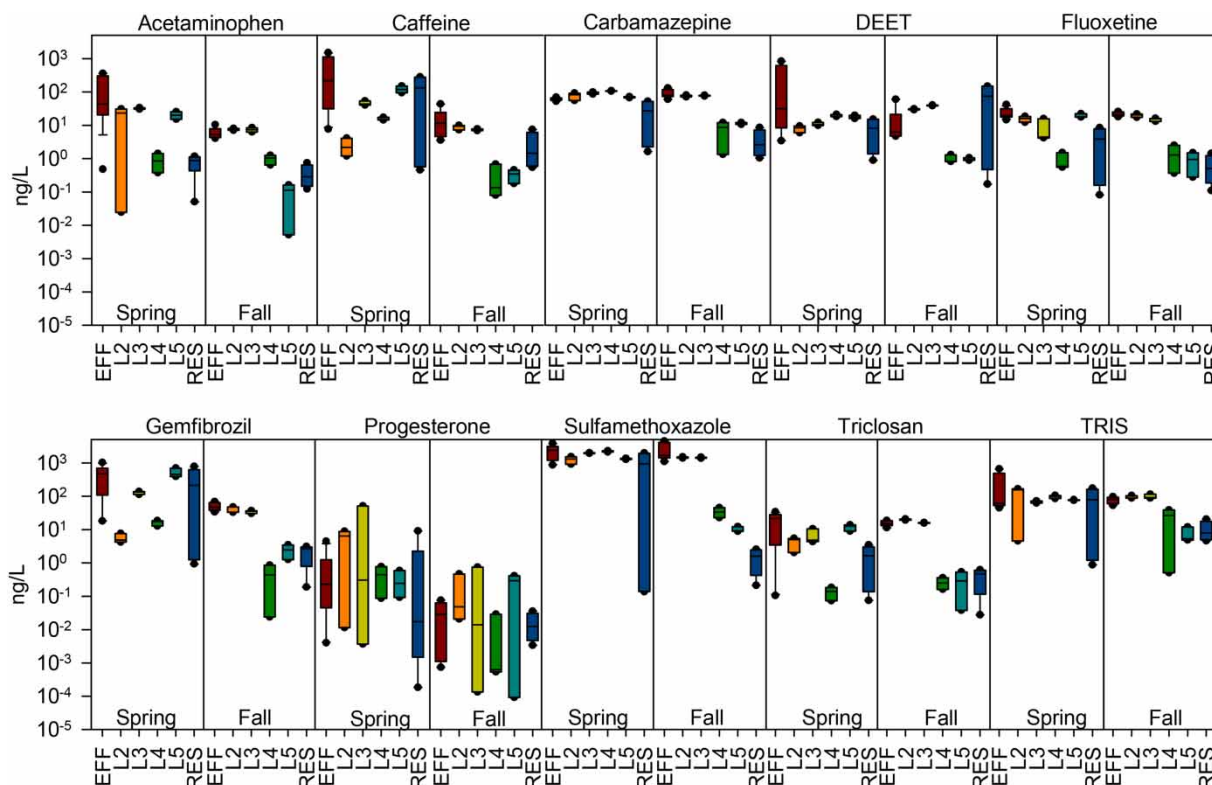

**Figure 2** | Concentrations of PPCP in Hyrum City WWTP effluent and sampling locations throughout the reclaimed water distribution system, (top panel) collected at beginning of irrigation season in spring (April and May) and (bottom panel) at the end of irrigation season in the fall (August and September). EFF, effluent ( $n=6$  in fall and  $n=12$  in spring); RES, reservoir ( $n=4$  in fall and  $n=6$  in spring); L2, L3, L4 and L5 ( $n=3$  each in both seasons) indicate sample locations shown in Figure 1. The 5th and 95th percentiles are indicated by the circles, medians are indicated by the horizontal lines and while the boxes indicate the interquartile range of concentrations.

specifically, *E. coli* and enterococci were  $0.66 \pm 0.83$  and  $1.5 \pm 1.1$  log cells/100 mL (after accounting for numbers of *uidA* and 23S gene copies per cell). In contrast, the distribution lines had higher culture-based concentrations ( $199 \pm 581$  *E. coli* and  $127 \pm 216$  enterococci CFU/100 mL) as compared to qPCR-based methods ( $20.9 \pm 49.6$  and  $33.7 \pm 134$  gene copies/100 mL for *E. coli* and enterococci). The geometric mean of *E. coli* (23 CFU/100 mL) was below the Food Safety Modernization Act irrigation water limit (126 CFU/100 mL) (FDA 2016). The mean concentrations of pathogens in the reservoir were typically lower than in the treatment plant effluent and the distribution system (Figure 3). *Legionella* was detected infrequently (9 of 29 water samples and quantifiable in 2 samples) and had low concentrations ( $8.0 \pm 15$  gene copies/100 mL when quantifiable). Similarly, *Giardia* was detected infrequently (1 of 19 water samples). Therefore, *Legionella* and *Giardia* were not tested for in vegetable and soil samples. The antibiotic resistance profiles of the reclaimed wastewater effluent, reservoir and distribution system indicated the presence of eight different families of drug resistance (Supplementary Figure S3) and included aminoglycosides, beta-lactamase, chloramphenicol, sulfonamide, tetracycline, macrolides, metal resistance genes and multi-drug resistance. Typically, the water in the reclaimed wastewater distribution system contained a larger percentage of multi-drug resistant genes than the reservoir water or the WWTP effluent. It is suspected that the biofilms in the distribution system are harboring the antibiotic resistance genes and serving as a location for horizontal gene transfer as reported by others (Garner *et al.* 2018). Given the persistence of the antibiotics in the reclaimed wastewater (Figure 2), there is selective pressure to maintain these antibiotic resistance genes within the biofilm population.

### Distribution of pathogens in vegetable and soil samples

Pathogen genomic material was frequently detected on home garden produce and in soils (Figure 3). There was a wide variability in the pathogen detection frequency with the *uidA* gene of *E. coli* (87%) and the 23S gene of enterococci (88%) being

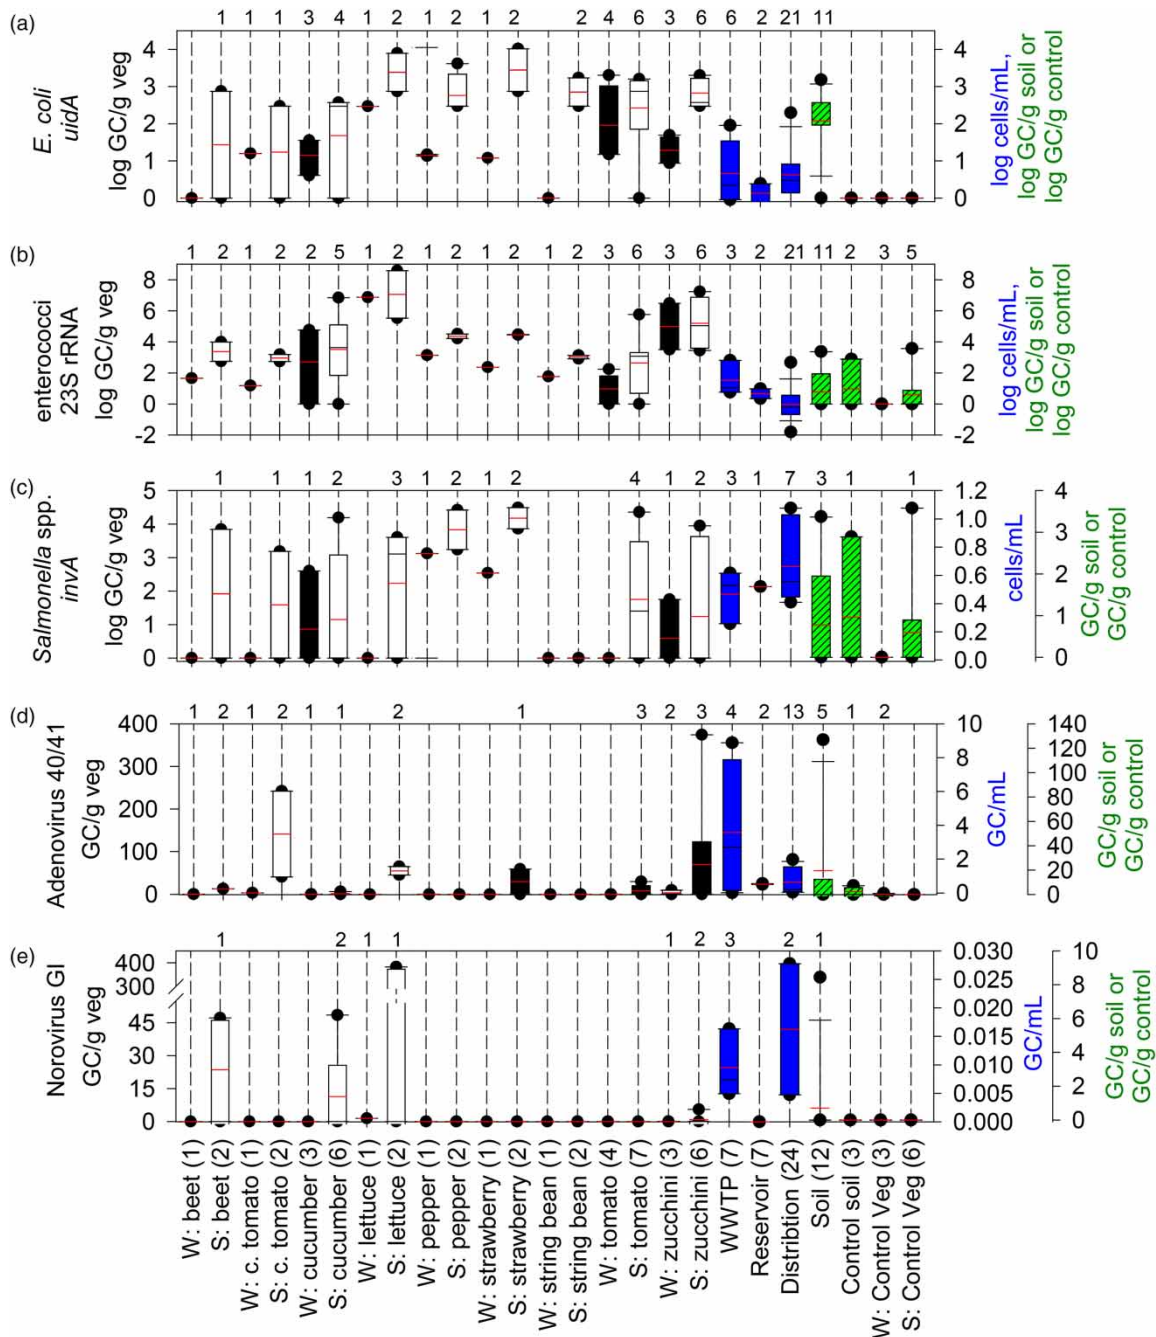

**Figure 3** | Abundance of pathogens observed in home garden produce (black and white), soils (green), reuse wastewater (blue) and control vegetable samples (green). W, wash sample; S, stomacher sample; c. tomato, cherry tomato; GC, gene copies. Numbers in parentheses after sample names indicate the number of samples tested in each category. Numbers above the figures indicate the number of samples in which the pathogen genes were detected, the red line indicates the mean, the circles represent the 5th and 95th outliers and the box represents the interquartile range. Please refer to the online version of this paper to see this figure in colour: <https://dx.doi.org/10.2166/wrd.2022.014>.

found most frequently, while *invA* gene of *Salmonella* (40%), adenovirus 40/41 (42%) and norovirus GI (17%) were detected less frequently. The highest pathogen concentrations observed were for enterococci ranging from  $3.4 \pm 2.1$  log gene copies/g, then the *uidA* gene of *E. coli* at  $2.1 \pm 1.2$  log gene copies/g, *invA* gene of *Salmonella* spp. at  $1.3 \pm 1.7$  log gene copies/g, adenovirus 40/41 at  $23 \pm 69$  gene copies/g and norovirus at  $15 \pm 66$  gene copies/g. In all cases, the pathogen genomic material was in higher concentration in stomached samples as compared to the corresponding vegetable rinse water (Figure 3).



Culturable enterococci were found more frequently in the stomached vegetable samples (23 of 37 samples) than in the rinse water (20 of 40 samples) from the vegetables. In contrast, fewer culturable *E. coli* were detected in stomached vegetable samples (12 of 37 samples) than in the rinse water (17 of 40 samples). Culturable enterococci (5 of 12 composite samples) and *E. coli* (1 of 12 composite samples) were detected in the garden soils, although at low levels ( $3.4 \pm 6.3$  enterococci CFU/g and  $0.08 \pm 0.29$  *E. coli* CFU/g). Pathogen genomic material was in higher concentration in soils compared to culture-based results (Figure 3) and ranged from 20 gene copies/g soil to 4 log gene copies/g soil.

Eight antibiotic resistance families were detected in lettuce, cucumber, zucchini and cherry tomatoes (Supplementary Figure S3). In general, the cherry tomatoes and lettuce were found to have higher abundances of antibiotic resistance genes than the cucumbers and zucchini. These findings support the studies by others that suggested antibiotic resistance genes decreased in concentration along the continuum from soil, rhizosphere, roots, leaves and fruits (Cerqueira *et al.* 2019). In this study, sulfonamide resistance genes made up 7–28% of the antibiotic resistance genes detected in the crops in which sulfamethoxazole was quantifiable (Table 1 and Supplementary Figure S3), i.e., lettuce, zucchini and cucumber. Relatively few studies have reported on field trials evaluating the plant uptake of antibiotics from reclaimed water irrigation (Malchi *et al.* 2014; Wu *et al.* 2014; Prosser & Sibley 2015; Christou *et al.* 2017a). In contrast to the results herein, some studies did not detect the accumulation of sulfamethoxazole in tissues of vegetables irrigated with water containing 0.28–250 ng/L of the antibiotic (Goldstein *et al.* 2014a; Wu *et al.* 2014), yet others reported accumulation in select crops (Malchi *et al.* 2014; Franklin *et al.* 2016).

### Distribution of PPCPs in vegetable and soil samples

The frequency of detection of PPCPs, as well as the maximum concentration detected in various samples collected during the field study, is shown in Table 1. Samples included home garden spigots, home garden vegetables and soils that were irrigated with reclaimed wastewater and corresponding samples from the control locations. The spigot water from the Salt Lake City

**Table 1** | Frequency and maximum concentration of PPCPs detected in the household spigot, vegetable and soil samples, and corresponding Margin of Exposure (MOE) and quantities of reclaimed wastewater or produce grown with reclaimed wastewater that would need to be consumed to reach clinical dose (ACE, CAFF, CARB, FLUO, GEMF, PROG) or toxicity endpoints (DEET, SULF, TRIC, TRIS)

| Compound <sup>a</sup> | Spigot (ng/L)       | Crops (ng/g)       | Soils (ng/g)      | MOE <sup>b</sup> | Quantity of Spigot water consumed to reach risk threshold <sup>b</sup> | Quantity of vegetables consumed to reach risk threshold <sup>b</sup> |
|-----------------------|---------------------|--------------------|-------------------|------------------|------------------------------------------------------------------------|----------------------------------------------------------------------|
| ACE                   | 0 of 15             | 1 of 66<br>(33.7)  | 1 of 20<br>(4.0)  | 278 (Plant)      | NA                                                                     | 98 Ton/d                                                             |
| CAFF                  | 7 of 15<br>(4.3)    | 4 of 66<br>(23.9)  | 3 of 20<br>(11.2) | 21,792 (Plant)   | 24.6 Mgal/d                                                            | 18 Ton/d                                                             |
| CARB                  | 14 of 15<br>(13.5)  | 18 of 66<br>(10.9) | 10 of 20<br>(2.3) |                  | 31.3 Mgal/d                                                            | 162 Ton/d                                                            |
| DEET                  | 15 of 15<br>(104.8) | 4 of 66<br>(27.3)  | 0 of 20           | 10,902 (Plant)   | 0.53 Mgal (TD <sub>LO</sub> )                                          | 0.85 (TD <sub>LO</sub> ) Ton                                         |
| FLUO                  | 9 of 15<br>(13.6)   | 34 of 66<br>(63.5) | 8 of 20<br>(5.5)  |                  | 1.2 Mgal/d                                                             | 1.0 T/d                                                              |
| GEMF                  | 0 of 15             | 0 of 66            | 0 of 20           |                  | NA                                                                     | NA                                                                   |
| PROG                  | 8 of 15<br>(24.8)   | 33 of 66<br>(25.0) | 4 of 20<br>(6.0)  | 238 (Plant)      | 1.1 Mgal/d                                                             | 4.4 T/d                                                              |
| SULF                  | 15 of 15<br>(284.4) | 12 of 66<br>(44.5) | 0 of 20           |                  | 10.4 Mgal (TD <sub>LO</sub> )                                          | 277 T                                                                |
| TRIC                  | 1 of 15<br>(11.3)   | 0 of 66            | 0 of 20           |                  | 23,800 gal/d                                                           | NA                                                                   |
| TRIS                  | 5 of 15<br>(20.4)   | 0 of 66            | 0 of 20           |                  | 444 (Infant) gal/d                                                     | NA                                                                   |

<sup>a</sup>ACE, Acetaminophen; CAFF, Caffeine; CARB, Carbamazepine; DEET, *N,N*-diethyl-metatoluamide; FLUO, Fluoxetine; GEMF, Gemfibrozil; PROG, Progesterone; SULF, Sulfamethoxazole; TRIC, Triclosan; TRIS, *Tris*-(2-chloroethyl) Phosphate.

<sup>b</sup>Clinical dose or toxicity endpoint tabulated in Supplementary Table S5.

control site had detectable concentrations of carbamazepine and DEET in all samples, while progesterone and sulfamethoxazole were detected in one of the three samples collected (Supplementary Table S6).

PPCP detection was generally more frequent and at higher concentrations in the Hyrum household samples compared to the control location samples (Table 1 and Supplementary Table S6), indicating that the Hyrum WWTP effluent did impact PPCP concentrations in home garden samples collected in this study (Table 1). All PPCPs that were found in household spigot water, except triclosan and *tris*-(2-chloroethyl), were found in fruits and vegetables irrigated with this reclaimed wastewater. Triclosan (Wu *et al.* 2013) has been reported to accumulate in plant roots although roots were not analyzed in this study. Triclosan also biodegrades in soil (Durán-Álvarez *et al.* 2015) supporting the lack of detection of this compound in both the irrigated and control soils. In contrast to the results herein, the flame retardant *tris*-(2-chloroethyl) phosphate was reported by others to accumulate in strawberries and lettuce up to 200 ng/g dry weight (Hyland *et al.* 2015a). It was shown that the accumulation and translocation of *tris*-(2-chloroethyl) phosphate was primarily due to transport from the roots to shoots (Hyland *et al.* 2015b). Therefore, although this flame retardant was detected in 30% of the spigot water samples, its lack of detection in soils, likely due to biological transformation of the compound in soils (Zhang *et al.* 2021), resulted in a lack of accumulation of the compound in vegetables in this study.

DEET and sulfamethoxazole accumulated in the edible portion of plants but were not detected in the soil (Table 1). Acetaminophen, caffeine, carbamazepine, fluoxetine and progesterone also accumulated in the edible portion of plants in concentrations 2–13 times greater than found in the adjacent soil (Table 1). Fluoxetine as a cation, sorbs to soil limiting plant uptake (Wu *et al.* 2010, 2014) and has limited translocation within plants (Wu *et al.* 2013). But in this study fluoxetine was one of the more frequently detected PPCP in vegetable samples (52%) and was found in all vegetable types (cucumber, tomato, squash, peppers, apples, potato, strawberry) (Supplementary Figure S4). Progesterone was also present in 50% of the tested vegetables (mean of  $10.16 \pm 4.57$  ng/g) as well as 53% of the spigot water (mean of  $4.07 \pm 5.84$  ng/L) and in 20% of the tested soil samples (mean of  $3.84 \pm 1.51$  ng/g) (Supplementary Figure S4). Progesterone, however, has been reported to be naturally present in plant tissue including tomato, apples, potato, peas and beans and functions as a natural plant growth regulator (Janeczko 2012). Detection of progesterone in control plant samples in this study, including tomatoes, onion and potatoes, occurred at a lower frequency (33%) and at a lower average ( $8.48 \pm 3.22$  ng/g) but not statistically different concentration than plants irrigated with reclaimed wastewater. Gemfibrozil was not detected in spigot, plant nor soil samples despite being consistently detected in the WWTP effluent and distribution line samples (Figure 2 and Table 1).

### Quantitative microbial risk assessment

The annual probability of illness from eating vegetables irrigated with this reclaimed wastewater exceeded the United States average rate of foodborne illness (Figure 4(a)) when residents ate raw home-grown vegetables more than 90 days of the year. In particular, the risk of gastroenteritis was estimated to be highest from adenovirus 40/41 and enterococci. Estimates of the gastroenteritis risk from pathogens measured in water were always lower than the risk estimated from pathogens on vegetables not removed by rinsing (i.e., processed by stomaching where the whole vegetable is mashed). The risk estimated from qPCR-based detection of *E. coli* and enterococci was always one or two-log greater than the risk estimated from culture-based concentrations of pathogens. Individuals who drink water from the reclaimed wastewater line had an unacceptable risk of gastroenteritis (i.e., exceeding 1 in 10,000 risk) regardless of how frequently they drank from the garden hose (Figure 4(b)). The QMRA estimated annual probability of illness model from exposure to pathogens on food was found to be most sensitive to pathogen concentration (Pearson's correlation,  $r=0.2-0.82$ ,  $P<0.0001$ ,  $n=10,000$ , Supplementary Table S7). In contrast, the volume of water consumed tended to be equally as important as the pathogen concentration for the drinking water exposure route (Supplementary Table S7).

As with all risk assessments, there are uncertainties in the input variables that should be considered when interpreting the results. The QMRA likely overestimated the risk to consumers as the dose of pathogens was estimated from qPCR results which include both live and dead organisms. Furthermore, the risk may be overestimated as the decay of pathogens on the vegetables after irrigation was not considered. Other inputs into the QMRA that could result in over or underestimation of risk include: the mass of the vegetable consumed, the volume of reclaimed wastewater retained on the vegetable, the individual bodyweight, exposure frequency, the volume of reclaimed wastewater consumed from a garden hose and the potential for population immunity. The role of population immunity in the risk of illness was not considered herein, but it is likely that

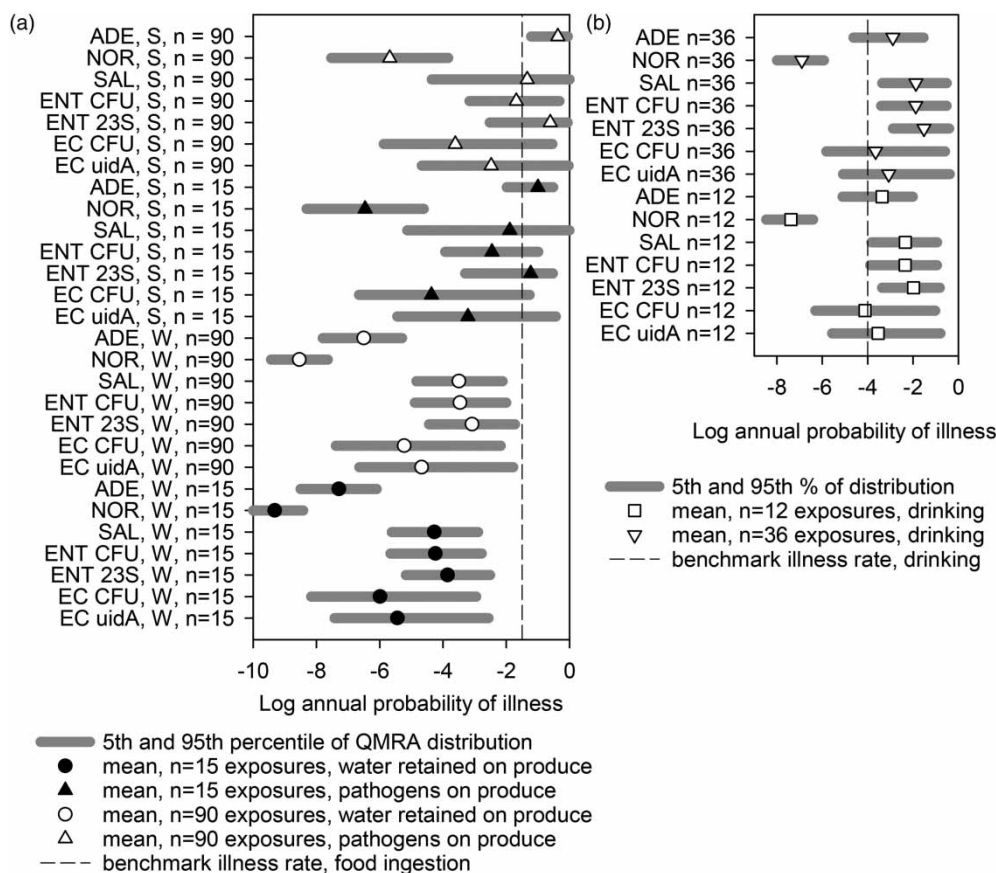

**Figure 4** | Log annual probability of illness from pathogens on (a) vegetables irrigated with reclaimed water and (b) from drinking irrigation water from garden hoses. EC *uidA*, *uidA* gene of *E. coli*; ENT 23S, 23S gene of enterococcus; CFU, colony forming units; ADE, adenovirus; NOR, norovirus; SAL, *Salmonella* spp.; S, pathogen abundance measured on the vegetables by the stomacher method; W, pathogen abundance assumed to be in reclaimed wastewater retained on vegetables,  $n=15$  or 90 assumes 15 or 90 days of eating raw vegetables during the summer growing season. Vertical dashed lines indicate the benchmark foodborne illness from produce (15 in 1,000 annual probability of illness) and from drinking water (1 in 10,000 annual probability of illness). The symbols indicate the mean probability of illness by organism and exposure frequency and the gray horizontal lines indicate the range of 5th and 95th percentiles of the Monte Carlo simulations.

sustained exposure to the pathogens in the reclaimed wastewater used for irrigation may result in fewer annual illnesses in this exposed population.

### PPCP risk assessment

The chemical risk assessment based on clinical dose or toxicity endpoints available for the PPCPs monitored in this study is shown in Table 1 and is considered negligible for all PPCPs evaluated. The calculated MOE for water or vegetable consumption values were based on the highest concentrations of a given PPCP detected in a spigot or vegetable sample collected during the study (Table 1), and the volume of water or mass of vegetable matter that would have to be consumed to reach the NOAEL for that PPCP. The ADI via ingestion by exposure pathway (contaminated food and water) and route (drinking or eating contaminated food or water) is listed as the water volume (gallons per day) or mass (tons per day of produce) that would be required to be consumed to reach either the clinical dose, the lowest toxic threshold dose  $TD_{LO}$  or the recommended ADI, whichever was lower. The lowest MOE was determined to be 238 based on a daily consumption of 336 g/d of green beans grown in the garden location with the maximum progesterone concentration of 25 ng/g (Table 1), compared to the recommended value for the MOE of 100 or more. Risks associated with clinical dose, toxic dose or ADI-related impacts were found to be even lower based on the excessive daily quantities of water (444 gal/d for infants exposed to *tris*-(2-chloroethyl phosphate) to 31.3 MGD for adults exposed to carbamazepine) or vegetables (0.85 T for adult DEET

exposure to 118 T/d for adult exposure to carbamazepine) that are required to be consumed to reach these levels of human health concern.

The PPCPs in the irrigation water all represent insignificant risks to the public under worst-case exposure assumptions of direct ingestion of either reclaimed wastewater itself, or raw foods irrigated with reclaimed wastewater containing low concentrations of these PPCPs. The required harmful human threshold consumption rates of water and produce from the private gardens sampled in this study are not physically possible, which confirms findings from other researchers (Prosser & Sibley 2015; Christou *et al.* 2017b) that human health risks associated with PPCPs in reclaimed wastewater appear to be *de minimis*, although this study did not evaluate degradation products of various PPCPs that may pose higher risk than the parent compound. Risk from PPCPs in reclaimed water via direct water ingestion or ingestion of raw foods irrigated with reclaimed wastewater does not contribute directly to the overall risk of reclaimed wastewater use in Hyrum, the bulk of which comes from health risks associated with pathogen exposure.

Limitations in the PPCP risk assessment primarily arise from the small subset of the potential organic chemicals present in the wastewater treatment system that were identified and quantified in this study. The compounds that were studied were selected based on their presence in other reclaimed wastewater sources, the range of physical/chemical/biological properties they represent and the authors' experience with these compounds in prior and on-going studies. There may be other compounds, i.e., PFAS compounds for example, that were not quantified in this study that could represent a greater human health risk than those that were studied. In addition, as Malchi *et al.* (2014) have suggested, metabolites could potentially represent greater risk than their parent compounds, and these issues warrant further study. Furthermore, lifetime exposure to PPCPs in home garden vegetables and reclaimed wastewater at low-doses observed in this study could present potential risks not captured by the clinical dose values available for these compounds.

## CONCLUSION

The results presented herein are one of the few studies looking at uptake of PPCPs, pathogens and antibiotic resistance genes in food crops at a field scale. Overall, the results suggest that after irrigation with reclaimed wastewater: (1) the risks from pathogens on crops eaten raw exceed benchmark levels of gastroenteritis in the US (Scallan *et al.* 2011), (2) the risks from exposure to PPCPs taken into crops or through direct ingestion of reclaimed wastewater is *de minimis*, but (3) multiple families of antibiotic resistance genes are present on food crops which may be associated with the presence of antibiotics in this reclaimed wastewater. Therefore, while the direct chemical risk from exposure to PPCPs is low, antibiotics in reclaimed water may exert selective pressure on microorganisms on food crops to acquire or maintain antibiotic resistance. When partnered with surveys of community members using the reclaimed wastewater (Flint & Koci 2021), this work suggests that increased outreach to the public is required to ensure community members are not drinking the nonpotable water and that they are properly washing harvested fruits and vegetables before consumption. Furthermore, the inclusion of a post-chlorination step should be considered for the reclaimed wastewater that is distributed for irrigation to minimize the growth and accumulation of biofilms and subsequent antibiotic resistance genes within the secondary water distribution system. Finally, QMRAs evaluating risk to consumers from irrigation with reclaimed wastewater should consider also sampling vegetation rather than just water to more accurately reflect the true health risk associated with reclaimed wastewater reuse.

## ACKNOWLEDGEMENTS

The authors acknowledge funding from the US Department of Agriculture (NIFA 2017-69007-26310). The authors are grateful to Stephen Cavanaugh and Rubayat Jamal for aid in processing the samples, Kevin Maughn for allowing access to the Hyrum WWTP and the Food Science laboratory at USU for access to the stomacher. The authors also thank the residents of Hyrum who allowed sampling of their irrigation water and garden crops.

## DATA AVAILABILITY STATEMENT

All relevant data are included in the paper or its Supplementary Information.

## CONFLICT OF INTEREST

The authors declare there is no conflict.

## REFERENCES

- Ahmed, W., Vieritz, A., Goonetilleke, A. & Gardner, T. 2010 Health risk from the use of roof-harvested rainwater in Southeast Queensland, Australia, as potable or nonpotable water, determined using quantitative microbial risk assessment. *Applied and Environmental Microbiology* **76** (22), 7382–7391.
- Ahmed, W., Zhang, Q., Lobos, A., Senkbeil, J., Sadowsky, M. J., Harwood, V. J., Saeidi, N., Marinoni, O. & Ishii, S. 2018 Precipitation influences pathogenic bacteria and antibiotic resistance gene abundance in storm drain outfalls in coastal sub-tropical waters. *Environment International* **116**, 308–318.
- Alonso, J., Amoros, I. & Cuesta, G. 2010 LNA probes in a real-time TaqMan PCR assay for genotyping of *Giardia duodenalis* in wastewaters. *Journal of Applied Microbiology* **108** (5), 1594–1601.
- Al-Sa'ed, R. 2007 Pathogens assessment in reclaimed effluent used for industrial crops irrigation. *International Journal of Environmental Research and Public Health* **4** (1), 68–75.
- Cerqueira, F., Matamoros, V., Bayona, J. M., Berendonk, T. U., Elsinga, G., Hornstra, L. M. & Piña, B. 2019 Antibiotic resistance gene distribution in agricultural fields and crops. A soil-to-food analysis. *Environmental Research* **177**, 108608.
- Chakravorty, S., Helb, D., Burday, M., Connell, N. & Alland, D. 2007 A detailed analysis of 16S ribosomal RNA gene segments for the diagnosis of pathogenic bacteria. *Journal of microbiological methods* **69** (2), 330–339.
- Chhipi-Shrestha, G., Hewage, K. & Sadiq, R. 2017 Fit-for-purpose wastewater treatment: conceptualization to development of decision support tool (I). *Science of the Total Environment* **607**, 600–612.
- Chitescu, C. L., Kaklamanos, G., Nicolau, A. I. & Stolker, A. A. M. 2015 High sensitive multiresidue analysis of pharmaceuticals and antifungals in surface water using U-HPLC-Q-Exactive Orbitrap HRMS. Application to the Danube river basin on the Romanian territory. *Science of the Total Environment* **532**, 501–511.
- Christou, A., Agüera, A., Bayona, J. M., Cytryn, E., Fotopoulos, V., Lambropoulou, D., Manaia, C. M., Michael, C., Revitt, M., Schröder, P. & Fatta-Kassinos, D. 2017a The potential implications of reclaimed wastewater reuse for irrigation on the agricultural environment: the knowns and unknowns of the fate of antibiotics and antibiotic resistant bacteria and resistance genes – a review. *Water Research* **123**, 448–467.
- Christou, A., Karaolia, P., Hapeshi, E., Michael, C. & Fatta-Kassinos, D. 2017b Long-term wastewater irrigation of vegetables in real agricultural systems: concentration of pharmaceuticals in soil, uptake and bioaccumulation in tomato fruits and human health risk assessment. *Water Research* **109**, 24–34.
- Coordinators, N. R. 2017 Database resources of the National Center for Biotechnology Information. *Nucleic Acids Research* **46** (D1), D8–D13.
- Dodgen, L., Li, J., Parker, D. & Gan, J. 2013 Uptake and accumulation of four PPCP/EDCs in two leafy vegetables. *Environmental Pollution* **182**, 150–156.
- Dodgen, L. K., Ueda, A., Wu, X., Parker, D. R. & Gan, J. 2015 Effect of transpiration on plant accumulation and translocation of PPCP/EDCs. *Environmental Pollution* **198**, 144–153.
- Domenech, E., Amorós, I., Moreno, Y. & Alonso, J. L. 2018 Cryptosporidium and Giardia safety margin increase in leafy green vegetables irrigated with treated wastewater. *International Journal of Hygiene and Environmental Health* **221** (1), 112–119.
- Durán-Álvarez, J., Prado, B., González, D., Sánchez, Y. & Jiménez-Cisneros, B. 2015 Environmental fate of naproxen, carbamazepine and triclosan in wastewater, surface water and wastewater irrigated soil – results of laboratory scale experiments. *Science of the Total Environment* **538**, 350–362.
- FDA 2016 *Food Safety Modernization Act Final Rule on Produce Safety: Standards for Growing, Harvesting, Packing and Holding of Produce for Human Consumption*. Food and Drug Administration.
- Flint, C. G. & Koci, K. R. 2020 Local resident perceptions of water reuse in Northern Utah. *Water Environment Research*. <https://doi.org/10.1002/wer.1367>.
- Flint, C. G. & Koci, K. R. 2021 Local resident perceptions of water reuse in Northern Utah. *Water Environment Research* **93** (1), 123–135.
- Franklin, A. M., Williams, C. F., Andrews, D. M., Woodward, E. E. & Watson, J. E. 2016 Uptake of three antibiotics and an antiepileptic drug by wheat crops spray irrigated with wastewater treatment plant effluent. *Journal of Environmental Quality* **45** (2), 546–554.
- Fu, Q., Malchi, T., Carter, L. J., Li, H., Gan, J. & Chefetz, B. 2019 Pharmaceutical and Personal Care Products: From Wastewater Treatment into Agro-Food Systems. *Environmental Science and Technology* **53**, 14083–14090.
- Garner, E., Chen, C., Xia, K., Bowers, J., Engelthaler, D. M., McLain, J., Edwards, M. A. & Pruden, A. 2018 Metagenomic characterization of antibiotic resistance genes in full-scale reclaimed water distribution systems and corresponding potable systems. *Environmental Science & Technology* **52** (11), 6113–6125.
- Goldstein, M., Shenker, M. & Chefetz, B. 2014a Insights into the uptake processes of wastewater-borne pharmaceuticals by vegetables. *Environmental Science & Technology* **48** (10), 5593–5600.
- Goldstein, R. E. R., Micallef, S. A., Gibbs, S. G., He, X., George, A., Sapkota, A., Joseph, S. W. & Sapkota, A. R. 2014b Occupational exposure to *Staphylococcus aureus* and *Enterococcus* spp. among spray irrigation workers using reclaimed water. *International Journal of Environmental Research and Public Health* **11** (4), 4340–4355.

- González-Escalona, N., Hammack, T., Jacobson, A. P. & Russell, M. 2009 Detection of live *Salmonella* sp. cells in produce by a TaqMan-based quantitative reverse transcriptase real-time PCR targeting *invA* mRNA. *Applied and Environmental Microbiology* **75** (11), 3714–3720.
- Gonzales-Gustavson, E., Rusiñol, M., Medema, G., Calvo, M. & Girones, R. 2019 Quantitative risk assessment of norovirus and adenovirus for the use of reclaimed water to irrigate lettuce in Catalonia. *Water Research* **153**, 91–99.
- Haas, C. N., Rose, J. B. & Gerba, C. P. 2014 *Quantitative Microbial Risk Assessment*, 2nd edn. John Wiley & Sons, Inc, Hoboken, NJ.
- Hamilton, A. J., Stagnitti, F., Premier, R., Boland, A.-M. & Hale, G. 2006 Quantitative microbial risk assessment models for consumption of raw vegetables irrigated with reclaimed water. *Applied and Environmental Microbiology* **72** (5), 3284–3290.
- Hyland, K. C., Blaine, A. C., Dickenson, E. R. & Higgins, C. P. 2015a Accumulation of contaminants of emerging concern in food crops – part 1: edible strawberries and lettuce grown in reclaimed water. *Environmental Toxicology and Chemistry* **34** (10), 2213–2221.
- Hyland, K. C., Blaine, A. C. & Higgins, C. P. 2015b Accumulation of contaminants of emerging concern in food crops – part 2: plant distribution. *Environmental Toxicology and Chemistry* **34** (10), 2222–2230.
- Janeczko, A. 2012 The presence and activity of progesterone in the plant kingdom. *Steroids* **77** (3), 169–173.
- Jjemba, P. K., Weinrich, L. A., Cheng, W., Giraldo, E. & LeChevallier, M. W. 2010 Regrowth of potential opportunistic pathogens and algae in reclaimed-water distribution systems. *Applied and Environmental Microbiology* **76** (13), 4169–4178.
- Kato, T., Miura, T., Okabe, S. & Sano, D. 2013 Bayesian modeling of enteric virus density in wastewater using left-censored data. *Food and Environmental Virology* **5** (4), 185–193.
- Liu, X., Liang, C., Liu, X., Zhao, F. & Han, C. 2020 Occurrence and human health risk assessment of pharmaceuticals and personal care products in real agricultural systems with long-term reclaimed wastewater irrigation in Beijing, China. *Ecotoxicology and Environment Safety* **190**, 110022.
- Malchi, T., Maor, Y., Tadmor, G., Shenker, M. & Chefetz, B. 2014 Irrigation of root vegetables with treated wastewater: evaluating uptake of pharmaceuticals and the associated human health risks. *Environmental Science & Technology* **48** (16), 9325–9333.
- Messner, M. J., Berger, P. & Nappier, S. P. 2014 Fractional Poisson – a simple dose-response model for human norovirus. *Risk Anal* **34** (10), 1820–1829.
- Metcalfe, W. W. & Wanner, B. L. 1993 Construction of new  $\beta$ -glucuronidase cassettes for making transcriptional fusions and their use with new methods for allele replacement. *Gene* **129** (1), 17–25.
- Miller, E. L., Nason, S. L., Karthikeyan, K. & Pedersen, J. A. 2016 Root uptake of pharmaceuticals and personal care product ingredients. *Environmental Science & Technology* **50** (2), 525–541.
- Mohr, M., Dockhorn, T., Drewes, J. E., Karwat, S., Lackner, S., Lotz, B., Nahrstedt, A., Nocker, A., Schramm, E. & Zimmermann, M. 2020 Assuring water quality along multi-barrier treatment systems for agricultural water reuse. *Journal of Water Reuse and Desalination* **10** (4), 332–346.
- Mordechay, E. B., Tarchitzky, J., Chen, Y., Shenker, M. & Chefetz, B. 2018 Composted biosolids and treated wastewater as sources of pharmaceuticals and personal care products for plant uptake: a case study with carbamazepine. *Environmental Pollution* **232**, 164–172.
- Munoz, I., Tomas, N., Mas, J., García-Reyes, J. F., Molina-Díaz, A. & Fernández-Alba, A. R. 2010 Potential chemical and microbiological risks on human health from urban wastewater reuse in agriculture. case study of wastewater effluents in Spain. *Journal of Environmental Science and Health Part B* **45** (4), 300–309.
- Paltiel, O., Fedorova, G., Tadmor, G., Kleinstern, G., Maor, Y. & Chefetz, B. 2016 Human exposure to wastewater-derived pharmaceuticals in fresh produce: a randomized controlled trial focusing on carbamazepine. *Environmental Science & Technology* **50** (8), 4476–4482.
- Powell, M. R., Ebel, E., Schlosser, W., Walderhaug, M. & Kause, J. 2000 Dose-response envelope for *Escherichia coli* O157: H7. *Quantitative Microbiology* **2** (2), 141–163.
- Prosser, R. & Sibley, P. 2015 Human health risk assessment of pharmaceuticals and personal care products in plant tissue due to biosolids and manure amendments, and wastewater irrigation. *Environment International* **75**, 223–233.
- Qin, Q., Chen, X. & Zhuang, J. 2015 The fate and impact of pharmaceuticals and personal care products in agricultural soils irrigated with reclaimed water. *Critical Reviews in Environmental Science and Technology* **45** (13), 1379–1408.
- Riemenschneider, C., Al-Raggad, M., Moeder, M., Seiwert, B., Salameh, E. & Reemtsma, T. 2016 Pharmaceuticals, their metabolites, and other polar pollutants in field-grown vegetables irrigated with treated municipal wastewater. *Journal of Agricultural and Food Chemistry* **64** (29), 5784–5792.
- Rose, J. B. & Gerba, C. P. 1991 Use of risk assessment for development of microbial standards. *Water Science and Technology* **24** (2), 29–34.
- Ryu, H., Alum, A., Mena, K. & Abbaszadegan, M. 2007 Assessment of the risk of infection by *Cryptosporidium* and *Giardia* in non-potable reclaimed water. *Water Science and Technology* **55** (1–2), 283–290.
- Santiago, P., Jiménez-Belenguer, A., García-Hernández, J., Estellés, R. M., Hernández Pérez, M., Castillo López, M. A., Ferrús, M. A. & Moreno, Y. 2018 High prevalence of *Salmonella* spp. in wastewater reused for irrigation assessed by molecular methods. *International Journal of Hygiene and Environmental Health* **221** (1), 95–101.
- Scallan, E., Hoekstra, R. M., Angulo, F. J., Tauxe, R. V., Widdowson, M. A., Roy, S. L., Jones, J. L. & Griffin, P. M. 2011 Foodborne illness acquired in the United States – major pathogens. *Emerging Infectious Diseases* **17** (1), 7–15.
- Seidu, R., Sjölander, I., Abubakari, A., Amoah, D., Larbi, J. A. & Stenström, T. A. 2013 Modeling the die-off of *E. coli* and *Ascaris* in wastewater-irrigated vegetables: implications for microbial health risk reduction associated with irrigation cessation. *Water Science and Technology* **68** (5), 1013–1021.

- Shoushtarian, F. & Negahban-Azar, M. 2020 Worldwide regulations and guidelines for agricultural water reuse: a critical review. *Water* **12** (4), 971.
- Teunis, P., Schijven, J. & Rutjes, S. 2016 A generalized dose-response relationship for adenovirus infection and illness by exposure pathway. *Epidemiology and Infection* **144** (16), 3461–3473.
- Tseng, L. Y. & Jiang, S. C. 2012 Comparison of recreational health risks associated with surfing and swimming in dry weather and post-storm conditions at Southern California beaches using quantitative microbial risk assessment (QMRA). *Marine Pollution Bulletin* **64** (5), 912–918.
- USEPA 2002a *Method 1600: Enterococci in Water by Membrane Filtration Using Membrane-Enterococcus Indoxyl- $\beta$ -D-Glucoside Agar (mEI)*. EPA-821-R-09-016. US EPA, Washington, DC, USA.
- USEPA 2002b *Method 1603: Escherichia coli (E. coli) in Water by Membrane Filtration Using Modified Membrane-Thermotolerant Escherichia coli Agar (Modified mTEC)*. EPA-821-R-02-023. US EPA, Washington, DC, USA.
- USEPA 2019 *Update for Chapter 3 of the Exposure Factors Handbook, Ingestion of Water and Other Select Liquids*. EPA/600/R-18-259F, US Environmental Protection Agency. Available from: <https://www.epa.gov/expobox/about-exposure-factors-handbook> (accessed June 2020).
- van Ginneken, M. & Oron, G. 2000 Risk assessment of consuming agricultural products irrigated with reclaimed wastewater: an exposure model. *Water Resources Research* **36** (9), 2691–2699.
- Verbyla, M. E., Symonds, E. M., Kafle, R. C., Cairns, M. R., Iriarte, M., Mercado Guzmán, A., Coronado, O., Breitbart, M., Ledo, C. & Mihelcic, J. R. 2016 Managing microbial risks from indirect wastewater reuse for irrigation in urbanizing watersheds. *Environmental Science & Technology* **50** (13), 6803–6813.
- Wang, J. & Gardinali, P. R. 2014 Identification of phase II pharmaceutical metabolites in reclaimed water using high resolution benchtop orbitrap mass spectrometry. *Chemosphere* **107**, 65–73.
- Whiley, H. & Taylor, M. 2016 Legionella detection by culture and qPCR: comparing apples and oranges. *Critical Reviews in Microbiology* **42** (1), 65–74.
- Wu, C., Spongberg, A. L., Witter, J. D., Fang, M. & Czajkowski, K. P. 2010 Uptake of pharmaceutical and personal care products by soybean plants from soils applied with biosolids and irrigated with contaminated water. *Environmental Science & Technology* **44** (16), 6157–6161.
- Wu, J., Long, S., Das, D. & Dorner, S. 2011 Are microbial indicators and pathogens correlated? A statistical analysis of 40 years of research. *Journal of Water and Health* **9** (2), 265–278.
- Wu, X., Ernst, F., Conkle, J. L. & Gan, J. 2013 Comparative uptake and translocation of pharmaceutical and personal care products (PPCPs) by common vegetables. *Environment International* **60**, 15–22.
- Wu, X., Conkle, J. L., Ernst, F. & Gan, J. 2014 Treated wastewater irrigation: uptake of pharmaceutical and personal care products by common vegetables under field conditions. *Environmental Science & Technology* **48** (19), 11286–11293.
- Wu, X., Dodgen, L. K., Conkle, J. L. & Gan, J. 2015 Plant uptake of pharmaceutical and personal care products from recycled water and biosolids: a review. *Science of the Total Environment* **536**, 655–666.
- Zhang, Q., Mei, W., Jiang, L., Zheng, Q., Luo, C. & Zhang, G. 2021 Environmental fate and effects of organophosphate flame retardants in the soil-plant system. *Soil Ecology Letters* **3**, 178–188.

First received 22 November 2021; accepted in revised form 5 July 2022. Available online 30 July 2022
